# Supplementary material
Source: Springer Nature journal article supplement (https://www.springermedizin.de/resource/supplementary/12916_2009_218_MOESM1_ESM.pdf/9599418)
Supplement: MOESM1 [file 9599418]



The diagram illustrates a management strategy for COPD. On the left, a large black arrow points downwards, labeled 'Increasing Severity'. To its right, four colored boxes are stacked vertically, representing treatment steps: a blue box for 'Increase in Dose / Frequency of Inhaled Bronchodilators', a red box for 'Systemic Corticosteroids', a green box for 'Antibiotics (if change in sputum)', and a purple box for 'Other Interventions, e.g. theophylline'. To the right of these boxes is a tall orange box labeled 'Oxygen +/- Ventilatory Support'. Below the purple box, a horizontal line is followed by a blue arrow pointing down to the text 'AND: consideration and management of co-morbidities'. A second horizontal line is followed by another blue arrow pointing down to the text 'THEN: consider appropriate exacerbation prevention strategies'. A final horizontal line is at the bottom of the diagram.

Increase in Dose / Frequency of Inhaled Bronchodilators

Systemic Corticosteroids

Antibiotics (if change in sputum)

Other Interventions, e.g.  
theophylline

Oxygen +/-  
Ventilatory  
Support

AND: consideration and management of co-morbidities

THEN: consider appropriate exacerbation prevention strategies

Increasing  
Severity
